# Supplementary material for: Carbon-Coated Si Nanoparticles Anchored on Three-Dimensional Carbon Nanotube Matrix for High-Energy Stable Lithium-Ion Batteries
Source: MDPI journal article supplement (doi:10.3390/batteries9020118), 2023-02-07
Supplement: s1 [file s1]

Archive with 1 entries (1 files):
- batteries-2143394-supplementary.pdf
