# Supplementary material for: Carbon-Coated Si Nanoparticles Anchored on Three-Dimensional Carbon Nanotube Matrix for High-Energy Stable Lithium-Ion Batteries
Source: MDPI journal article supplement (doi:10.3390/batteries9020118), 2023-02-07
Supplement: s1 [file s1 › batteries-2143394-supplementary.pdf]

**Supporting Information for**  
**Carbon-coated Si Nanoparticles Anchored on**  
**Three-dimensional Carbon Nanotube Matrix for High-Energy**  
**Stable Lithium Ion Batteries**

Hua Fang<sup>1,2,3,\*</sup>, Qingsong Liu<sup>1</sup>, Xiaohua Feng<sup>1</sup>, Ji yan<sup>1</sup>, Lixia Wang<sup>1,2,3</sup>, Linghao He<sup>1,\*</sup>,  
Linsen Zhang<sup>1,2,3,\*</sup>, and Guoqing Wang<sup>1,\*</sup>

1 College of Material and Chemical Engineering, Zhengzhou University of Light  
Industry, Zhengzhou 450001, China;

2 Ceramic Materials Research Center, Zhengzhou University of Light Industry,  
Zhengzhou, 450001, China;

3 Zhengzhou Key Laboratory of Green Batteries, Zhengzhou, 450001, China

\* Correspondence: fh@zzuli.edu.cn (H. Fang), helinghao@zzuli.edu.cn (L. He),  
hnlinsenzhang@163.com (L. Zhang), gqwang@zzuli.edu.cn (G. Wang)

## **Content**

S1. Photos of the as-prepared Si@C and Si/CNT@C powder samples

S2. Morphologies of Si NPs and Si@C composite

S3. Thermogravimetric curves of Si, Si@C, and Si/CNT@C samples.

S4. Electrochemical performance of Si, Si@C and Si/CNT@C Samples

## S1. Photos of the as-prepared Si/C@RF and Si/CNT@C powder samples

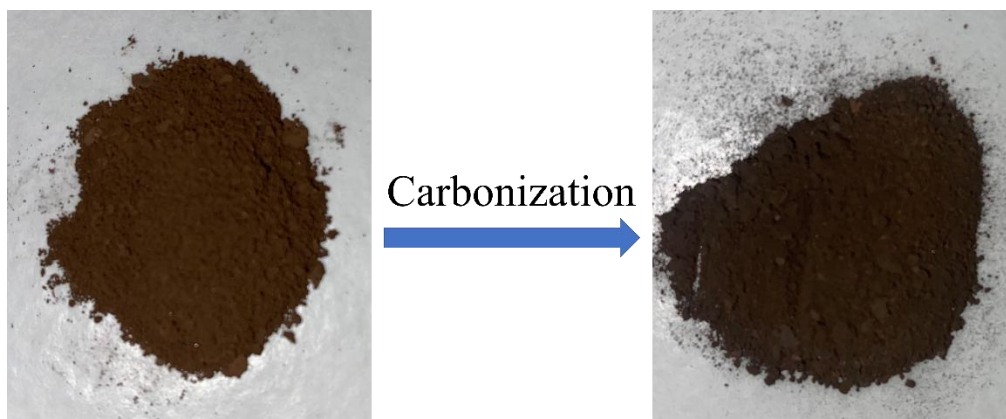

Figure S1 Photos of the as-prepared Si/C@RF and Si/CNT@C powder samples

As depicted in Figs S1, the brown powder material of the Si/CNT@RF resin composite was converted to the black Si/CNT@C composite via the carbonization process. The synthesis experiment can be expanded ten times to obtain gram-grade materials, proving that the reported synthetic strategy here is highly reproducible and scalable.

## S2. Morphologies of Si NPs and Si@C composite

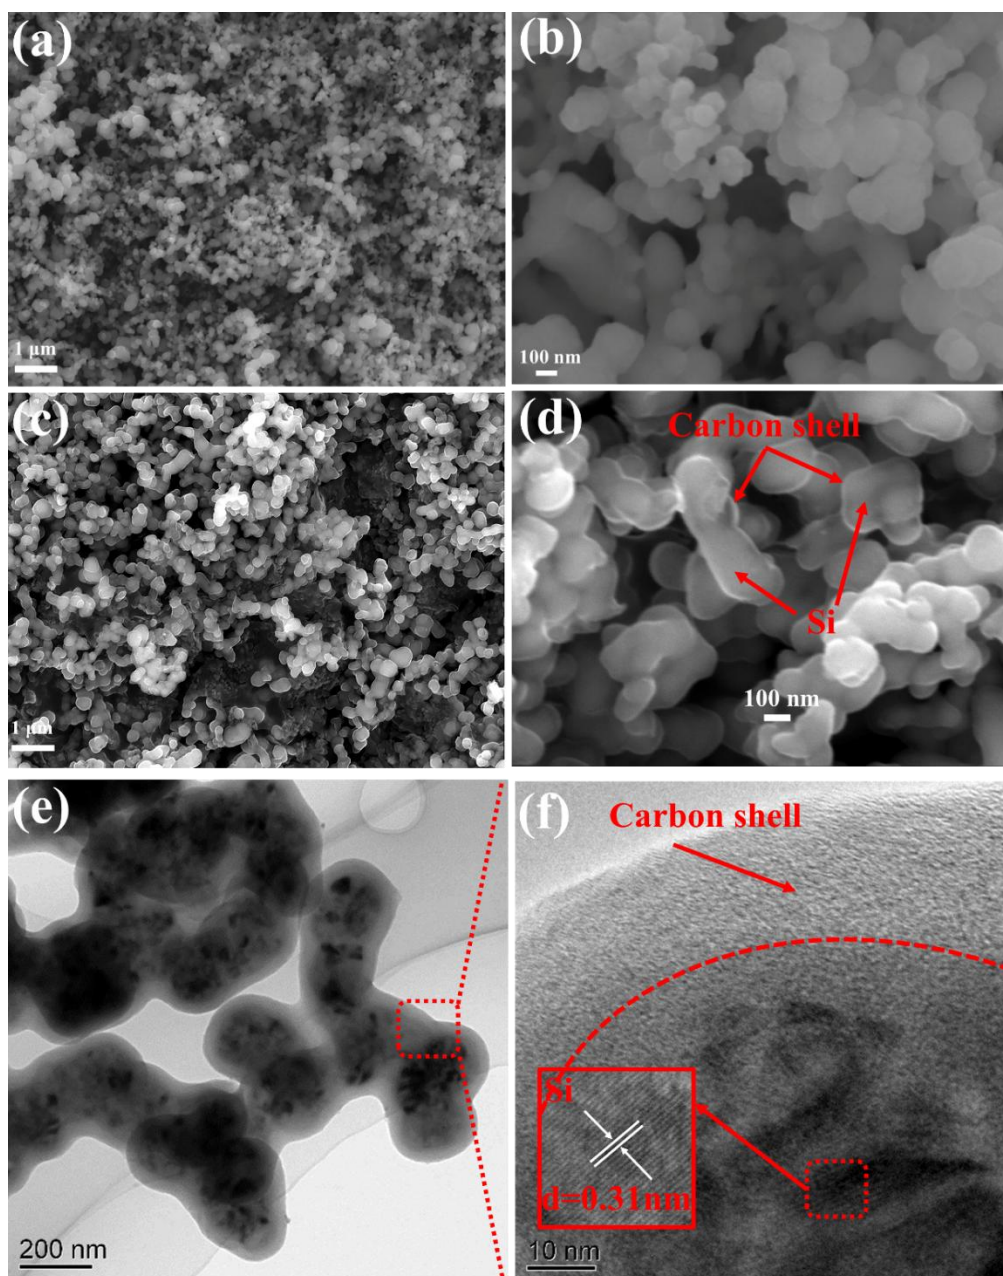

Figure S2 (a, b) SEM images of Si NPs, (c, d) SEM images, and (e, f) TEM images of Si@C composite.

As shown in Figs. S2(a, b), tiny Si NPs (50~100 nm), which were used for the fabrication of the Si/CNT@C composite, agglomerated together due to their high surface energy. After carbon coating, more obvious agglomeration can be seen from the SEM images (Figures S2c and S 2d) and TEM images (Figures S2e and S2f). The particle size of the Si@C samples reaches 100~200 nm, which conglomerated together to form much larger secondary particle aggregates. The carbon coating reaches ~10 nm thick.

### S3. Thermogravimetric curves of Si, Si@C, and Si/CNT@C samples.

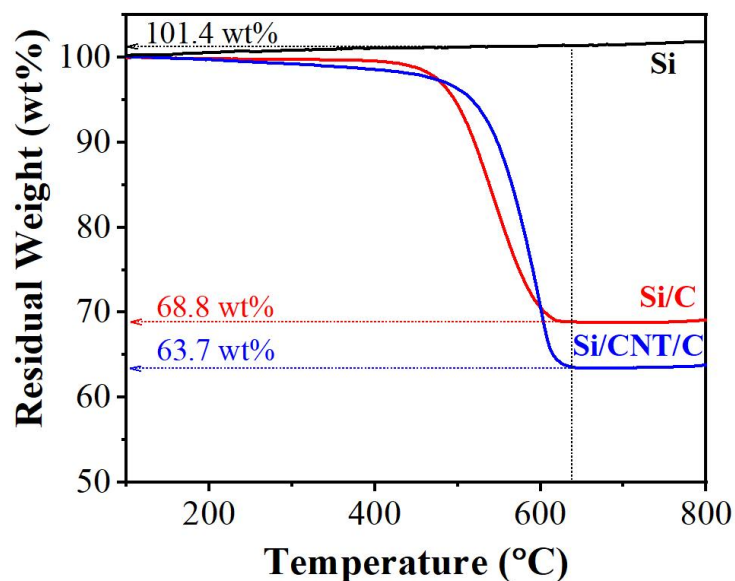

Figure S3 Thermogravimetric curves of Si, Si@C and Si/CNT@C samples

As shown in Figure S3, the weight of the bare Si NPs increased slightly (~101.4 wt%) when heat to 630 °C which can be attribute to the oxidation of silicon [1]. Taking the weight increase of bare Si into consideration, the mass ratio of Si in the Si@C sample is calculated as  $68.8 \text{ wt}\% \div 101.4 \text{ wt}\% \times 100 \text{ wt}\% = 67.9 \text{ wt}\%$ . Similarly, the the mass ratio of Si in the Si/CNT@C sample is calculated as  $63.7 \text{ wt}\% \div 101.4 \text{ wt}\% \times 100 \text{ wt}\% = 62.8 \text{ wt}\%$ . The mass ratios of carbon can be obtained by deducting the Si content from the total mass. The mass ratios of carbon in the Si@C and Si/CNT@C sample is calculated as 32.1 wt% and 37.2 wt%.

#### S4. Electrochemical performance of Si, Si@C and Si/CNT@C Samples

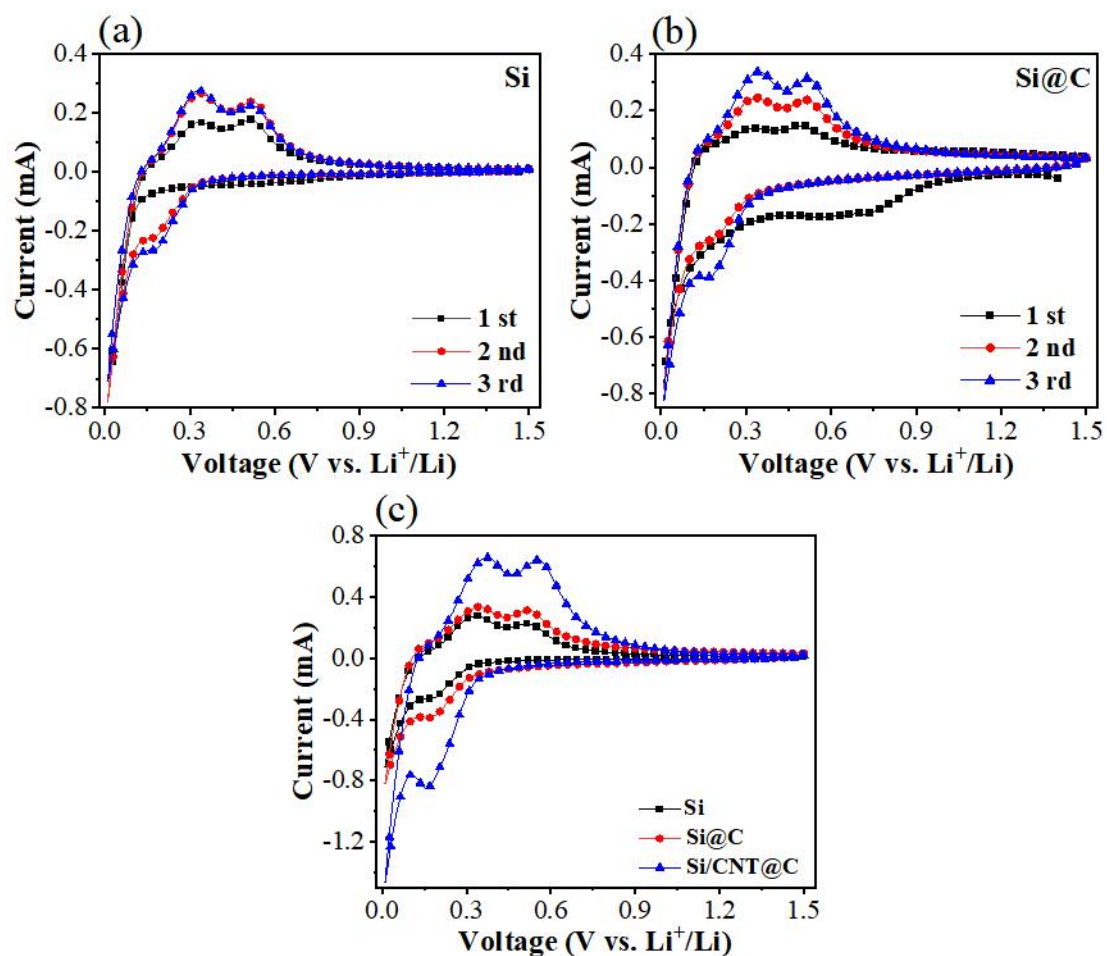

Figure S4 (a) CV curves of Si, (b) CV curves of Si@C, and (c) comparison of the third cycle CV curves of the Si, Si@C, and Si/CNT@C

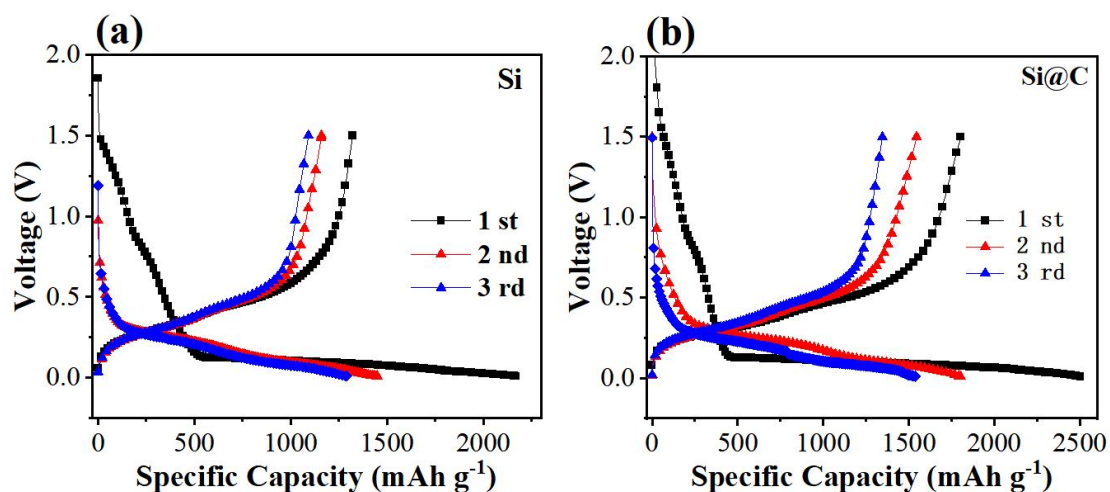

Figure S5 GCD curves of Si (a) and Si@C (b).

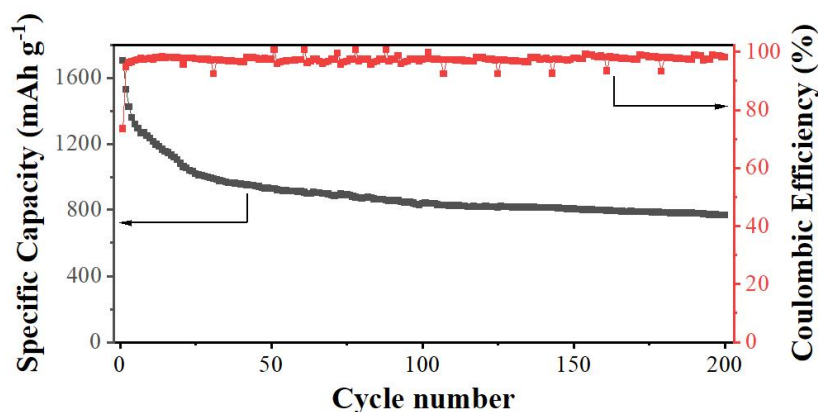

Figure S6 Cycle performances of the Si/CNT/C electrode at 0.5 A g<sup>-1</sup>

Table S1 Fitting results of the EIS curves

| Samples  | $R_s/\Omega$ |        | $R_{ct}/\Omega$ |        | CPE                  |        |       |        | $Z_w$ |        |       |        |       |        |
|----------|--------------|--------|-----------------|--------|----------------------|--------|-------|--------|-------|--------|-------|--------|-------|--------|
|          |              |        |                 |        | CPE-T                |        | CPE-P |        | W-R   |        | W-T   |        | W-P   |        |
|          | Value        | Error% | Value           | Error% | Value                | Error% | Value | Error% | Value | Error% | Value | Error% | Value | Error% |
| Si       | 2.0          | 3.06   | 92.5            | 1.70   | $8.2 \times 10^{-5}$ | 4.99   | 0.88  | 0.72   | 125.2 | 2.36   | 4.12  | 3.23   | 0.591 | 0.81   |
| Si@C     | 1.7          | 1.61   | 62.4            | 1.03   | 0.00011              | 3.34   | 0.84  | 0.51   | 139.2 | 3.74   | 5.863 | 2.51   | 0.652 | 2.16   |
| Si/CNT@C | 1.6          | 3.13   | 38.5            | 1.85   | $7.6 \times 10^{-5}$ | 4.41   | 0.81  | 0.63   | 34.94 | 2.62   | 4.034 | 3.62   | 0.586 | 0.91   |

Note 1: CPE-T and CPE-P represent the two resistors with constant phase elements [2].

Note 2: Warburg impedance (W) represents for the solid state diffusion of Li<sup>+</sup> and contains three parts: ohmic resistance (W-R), diffusion time constant (W-T), and Warburg exponent (W-P) [3].

Table S2 Comparison among the recently reported Si-based anode materials

| Sample           | Si content (wt%) | Synthetic method                           | Capacity (mAh g <sup>-1</sup> )                                                       | Ref.      |
|------------------|------------------|--------------------------------------------|---------------------------------------------------------------------------------------|-----------|
| Si/CNT@C         | 62.8             | in-situ polymerization                     | 1106 (0.1 A g <sup>-1</sup> , 200 cycles)<br>770 (0.5 A g <sup>-1</sup> , 200 cycles) | This work |
| SMPS-1           | 12.37            | Electrostatic adsorption                   | 501 (1A g <sup>-1</sup> , 500 cycles)                                                 | [4]       |
| GSCC             | 39.75            | self-assembly method                       | 837.3 (0.2 A g <sup>-1</sup> , 100 cycles)                                            | [5]       |
| Si/CNTs/C        | 40.4             | solid-state reaction                       | 702 (0.2 A g <sup>-1</sup> , 300 cycles)                                              | [6]       |
| C/Si/CNTs        | 42.17            | electrospinning                            | 696.8 (0.1 A g <sup>-1</sup> , 50 cycles)                                             | [7]       |
| Si@C@v@CNTs      | 14.1             | Sol-gel + CVD                              | 912.8 (0.1 A g <sup>-1</sup> , 100 cycles)                                            | [8]       |
| Si/CNTs@PMMA-C   | 88.3             | polymerization + carbonization             | 1024.8 (0.2 A g <sup>-1</sup> , 200 cycles)                                           | [9]       |
| RH-Nano Si@C/CNT | 72.4             | electrostatic self-assembly + hydrothermal | 989.5 (0.5C, 1000 cycles) (1C = 4.2 A g <sup>-1</sup> )                               | [10]      |
| Si/CNTs@(S)-C    | 58.8             | spray drying + template method             | 943 (0.2 C, 1000 cycles)                                                              | [11]      |

## References

- [1] A.-H. Liang, T.-H. Xu, S. Liou, Y.-Y. Li, Silicon Single Walled Carbon Nanotube-Embedded Pitch-Based Carbon Spheres Prepared by a Spray Process with Modified Antisolvent Precipitation for Lithium Ion Batteries, *Energy & Fuels*, 35 (2021) 9705-9713.
- [2] J. Liang, X. Li, Z. Hou, W. Zhang, Y. Zhu, Y. Qian, A Deep Reduction and Partial Oxidation Strategy for Fabrication of Mesoporous Si Anode for Lithium Ion Batteries, *ACS Nano*, 10 (2016) 2295-2304.
- [3] S. Saha, M. Jana, P. Khanra, P. Samanta, H. Koo, N. Chandra Murmu, T. Kuila, Band gap modified boron doped NiO/Fe<sub>3</sub>O<sub>4</sub> nanostructure as the positive electrode for high energy asymmetric supercapacitors, *RSC Advances*, 6 (2016) 1380-1387.
- [4] R. Xu, R. Wei, X. Hu, Y. Li, L. Wang, K. Zhang, Y. Wang, H. Zhang, F. Liang, Y. Yao, A strategy and detailed explanations to the composites of Si/MWCNTs for lithium storage, *Carbon*, 171 (2021) 265-275.
- [5] Y. Huang, W. Li, J. Peng, Z. Wu, X. Li, X. Wang, Structure Design and Performance of the Graphite/Silicon/Carbon Nanotubes/Carbon (GSCC) Composite as the Anode of a Li-Ion Battery, *Energy Fuels*, 35 (2021) 13491-13498.
- [6] Z. Fu, F. Bian, J. Ma, W. Zhang, Y. Gan, Y. Xia, J. Zhang, X. He, H. Huang, In Situ Synthesis of a Si/CNTs/C Composite by Directly Reacting Magnesium Silicide with Lithium Carbonate for Enhanced Lithium Storage Capability, *Energy Fuels*, 35 (2021) 20386-20393.
- [7] X. Kong, S. Luo, L. Rong, X. Xie, S. Zhou, Z. Chen, A. Pan, Enveloping a Si/N-doped carbon composite in a CNT-reinforced fibrous network as flexible anodes for high performance lithium-ion batteries, *Inorg. Chem. Front.*, 8 (2021) 4386-4394.
- [8] N. Han, J. Li, X. Wang, C. Zhang, G. Liu, X. Li, J. Qu, Z. Peng, X. Zhu, L. Zhang, Flexible Carbon Nanotubes Confined Yolk-Shelled Silicon-Based Anode with Superior Conductivity for Lithium Storage, *Nanomaterials-BASEL*, 11 (2021) 699.
- [9] J. Shi, X. Jiang, B. Ban, J. Li, J. Chen, Carbon nanotubes-enhanced lithium storage capacity of recovered silicon/carbon anodes produced from solar-grade silicon kerf scrap, *Electrochimica Acta*, 381 (2021) 138269.
- [10] W. An, B. Xiang, J. Fu, S. Mei, S. Guo, K. Huo, X. Zhang, B. Gao, P.K. Chu, Three-dimensional carbon-coating silicon nanoparticles welded on carbon nanotubes composites for high-stability lithium-ion battery anodes, *Appl. Surf. Sci.*, 479 (2019) 896-902.
- [11] H. Zhang, X. Zhang, H. Jin, P. Zong, Y. Bai, K. Lian, H. Xu, F. Ma, A robust hierarchical 3D Si/CNTs composite with void and carbon shell as Li-ion battery anodes, *Chem. Eng. J.*, 360 (2019) 974-981.
